# Supplementary material for: Patient-centered connectivity-based prediction of tau pathology spread in Alzheimer’s disease
Source: PubMed Central journal article supplement — Sci Adv. 2020 Nov 27;6(48):eabd1327. doi: 10.1126/sciadv.abd1327 (PMC7695466; doi:10.1126/sciadv.abd1327), 2020-11-27
Supplement: supp_6_48_eabd1327__1.pdf [file supp_6_48_eabd1327__1.pdf]

[advances.sciencemag.org/cgi/content/full/6/48/eabd1327/DC1](https://advances.sciencemag.org/cgi/content/full/6/48/eabd1327/DC1)

## Supplementary Materials for

### **Patient-centered connectivity-based prediction of tau pathology spread in Alzheimer's disease**

Nicolai Franzmeier\*, Anna Dewenter, Lukas Frontzkowski, Martin Dichgans, Anna Rubinski, Julia Neitzel, Ruben Smith, Olof Strandberg, Rik Ossenkoppele, Katharina Buerger, Marco Duering, Oskar Hansson, Michael Ewers\*

\*Corresponding author. Email: [nicolai.franzmeier@med.uni-muenchen.de](mailto:nicolai.franzmeier@med.uni-muenchen.de) (N.F.);  
[michael.ewers@med.uni-muenchen.de](mailto:michael.ewers@med.uni-muenchen.de) (M.E.)

Published 27 November 2020, *Sci. Adv.* **6**, eabd1327 (2020)  
DOI: 10.1126/sciadv.abd1327

#### **This PDF file includes:**

Figs. S1 to S3  
Tables S1 and S2

Supplementary Figure 1: Study flowchart

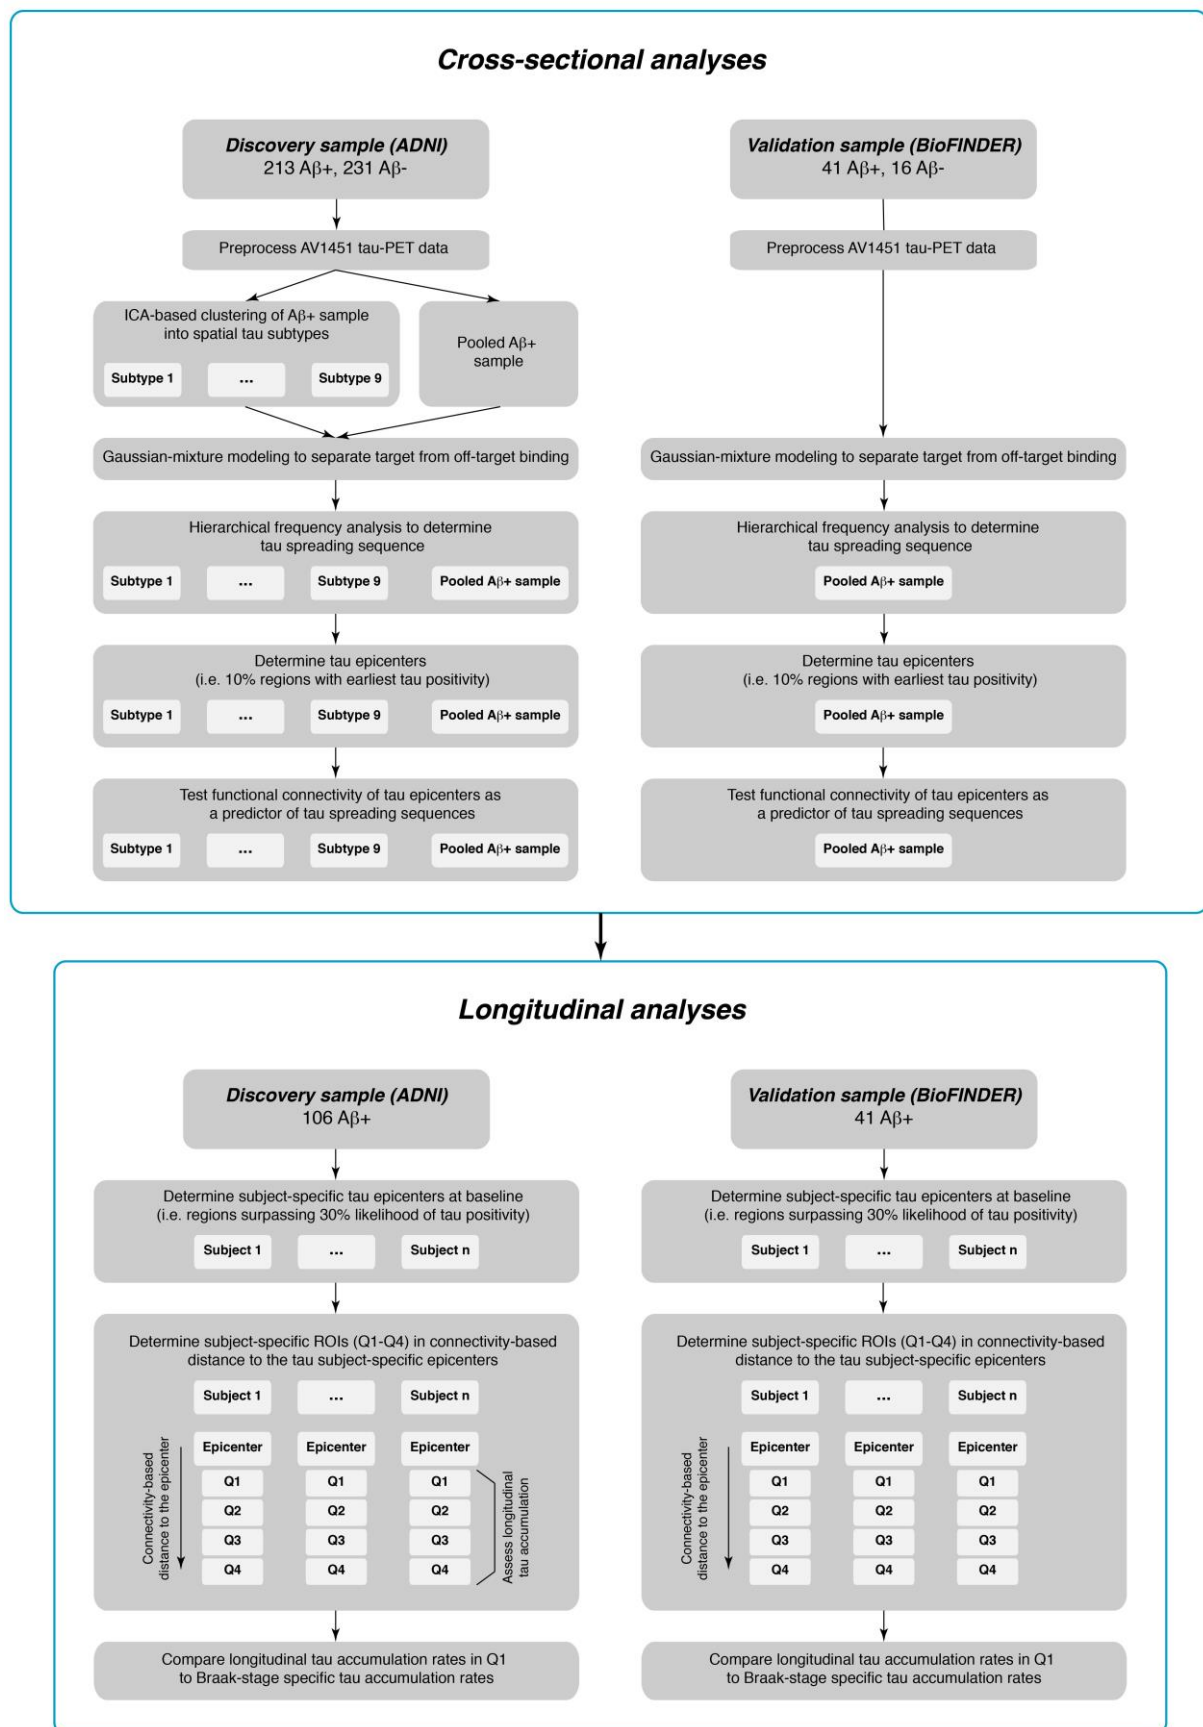

Flowchart schematically illustrating the analyses steps for cross-sectional and longitudinal analyses included in the current study.

Supplementary Figure 2: Connectivity-based prediction of subject specific tau positivity patterns

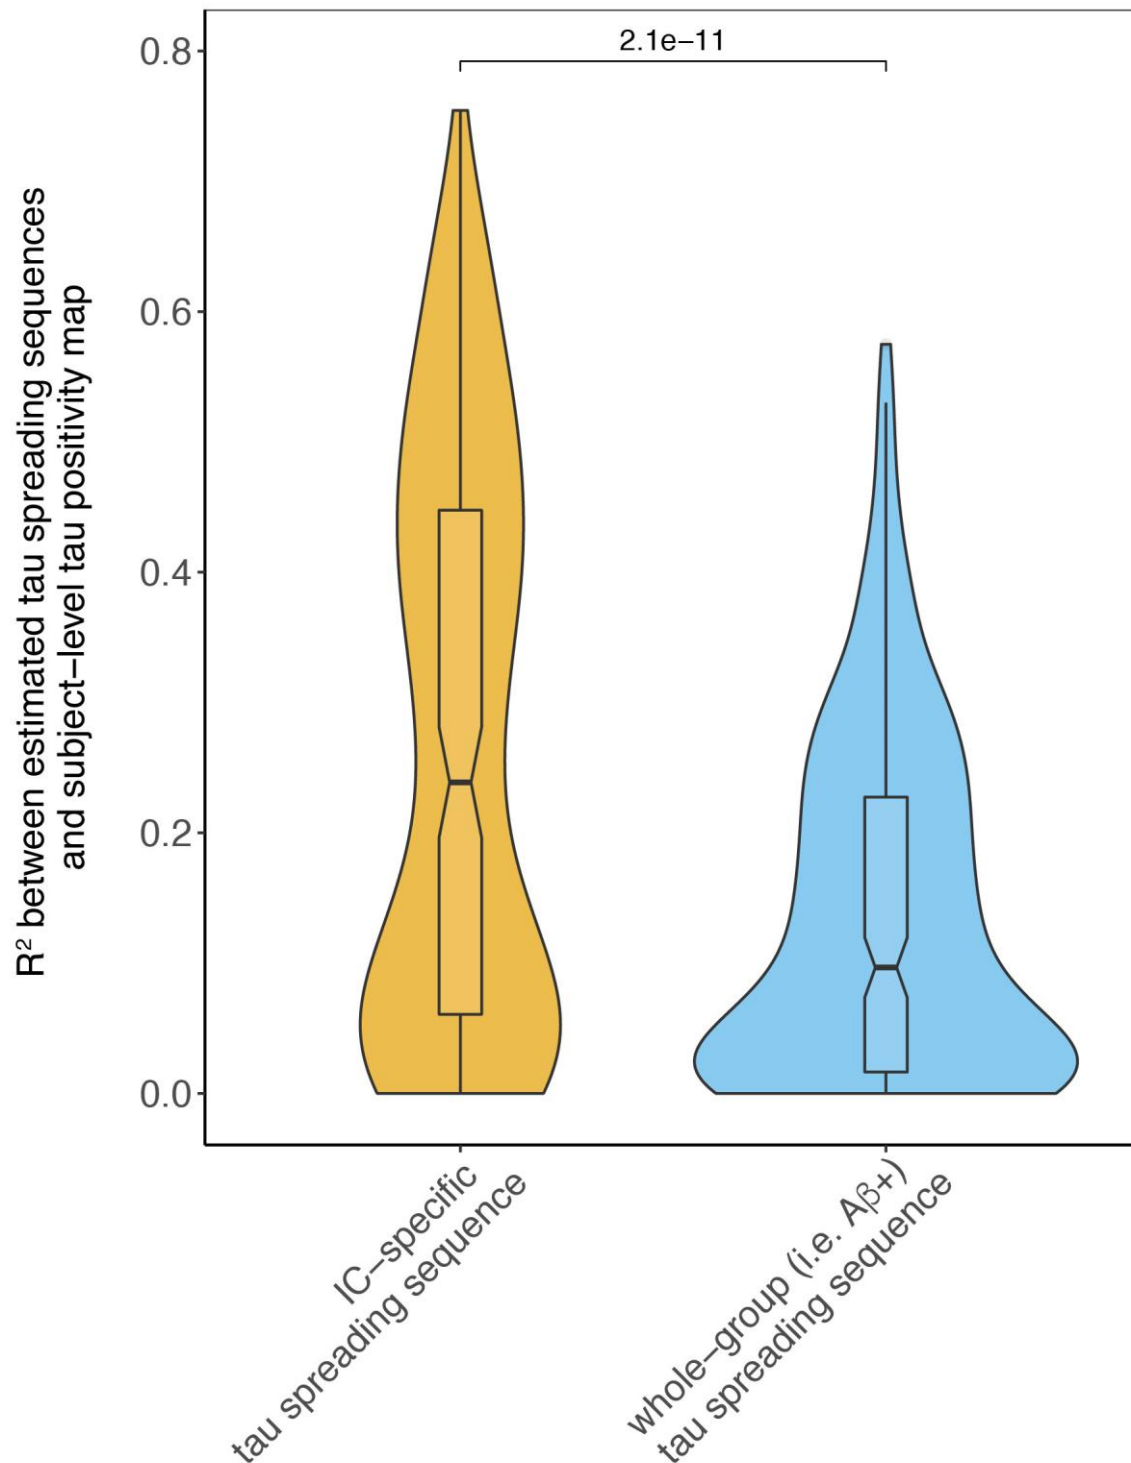

Spatial association (i.e.  $R^2$ ) between patient specific tau positivity maps and group-defined tau positivity sequences in ADNI A $\beta$ +.  $R^2$ -values were determined using either IC-specific tau positivity sequences (illustrated in Figure 5) or whole group tau positivity sequences (illustrated in Figures 2 A&C).  $R^2$ -values were compared using a paired Wilcoxon test.

*Supplementary Figure 3: Variability of tau epicenters across ICs*

## **Variability of tau epicenters across ICs**

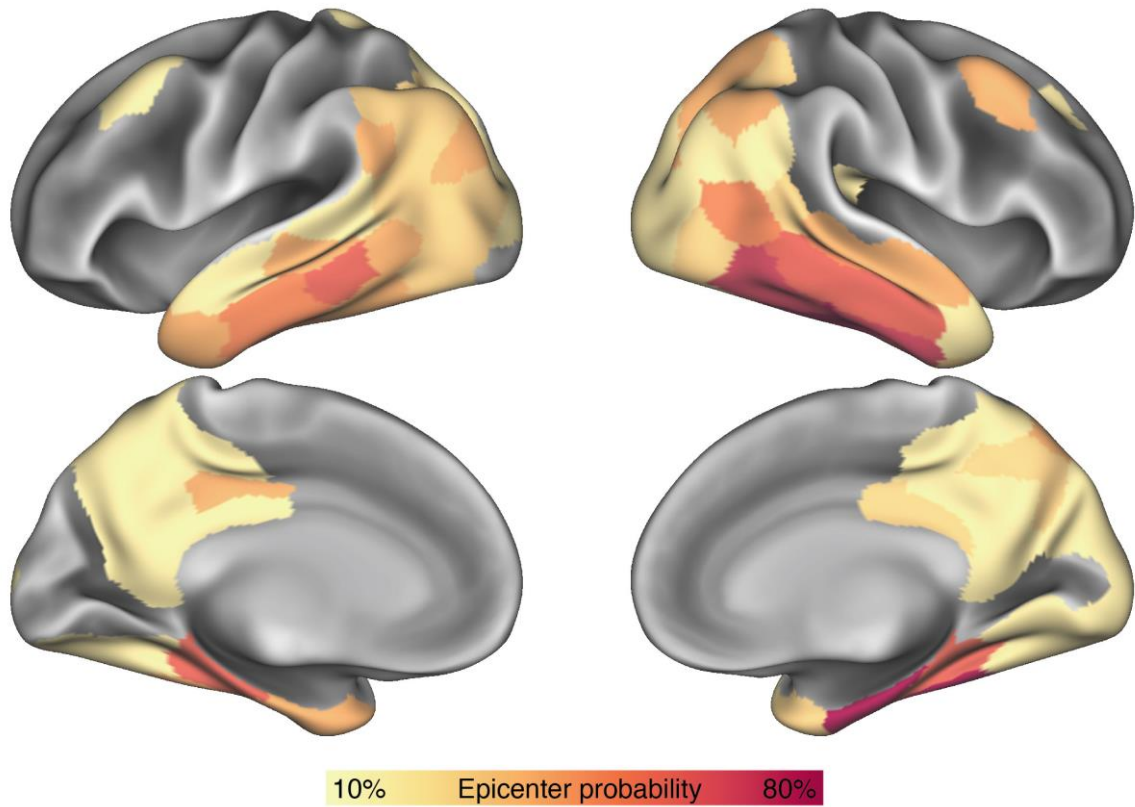

*Surface rendering of epicenter probabilities across ICs shown in figures 4-6.*

Supplementary table 1: Epicenter connectivity vs. tau positivity sequences at variable connectivity thresholds

| Prediction of group-average tau positivity sequences by epicenter connectivity (as shown in Figures 2G&H) at variable epicenter and connectivity thresholds |     |                                                                   |                       |                       |                       |
|-------------------------------------------------------------------------------------------------------------------------------------------------------------|-----|-------------------------------------------------------------------|-----------------------|-----------------------|-----------------------|
| <b>ADNI</b>                                                                                                                                                 |     | <b>Tau epicenter threshold (% of ROIs used as tau epicenters)</b> |                       |                       |                       |
|                                                                                                                                                             |     | 5%                                                                | 10%                   | 15%                   | 20%                   |
| <b>Connectivity density threshold<br/>(% of connections retained)</b>                                                                                       | 10% | $\beta=0.53, p<0.001$                                             | $\beta=0.61, p<0.001$ | $\beta=0.63, p<0.001$ | $\beta=0.62, p<0.001$ |
|                                                                                                                                                             | 20% | $\beta=0.65, p<0.001$                                             | $\beta=0.73, p<0.001$ | $\beta=0.72, p<0.001$ | $\beta=0.71, p<0.001$ |
|                                                                                                                                                             | 30% | $\beta=0.63, p<0.001$                                             | $\beta=0.72, p<0.001$ | $\beta=0.72, p<0.001$ | $\beta=0.71, p<0.001$ |
|                                                                                                                                                             | 40% | $\beta=0.63, p<0.001$                                             | $\beta=0.73, p<0.001$ | $\beta=0.73, p<0.001$ | $\beta=0.71, p<0.001$ |
|                                                                                                                                                             | 50% | $\beta=0.63, p<0.001$                                             | $\beta=0.73, p<0.001$ | $\beta=0.73, p<0.001$ | $\beta=0.71, p<0.001$ |
| <b>BioFINDER</b>                                                                                                                                            |     | <b>Tau epicenter threshold (% of ROIs used as tau epicenters)</b> |                       |                       |                       |
|                                                                                                                                                             |     | 5%                                                                | 10%                   | 15%                   | 20%                   |
| <b>Connectivity density threshold<br/>(% of connections retained)</b>                                                                                       | 10% | $\beta=0.59, p<0.001$                                             | $\beta=0.68, p<0.001$ | $\beta=0.74, p<0.001$ | $\beta=0.71, p<0.001$ |
|                                                                                                                                                             | 20% | $\beta=0.59, p<0.001$                                             | $\beta=0.71, p<0.001$ | $\beta=0.76, p<0.001$ | $\beta=0.74, p<0.001$ |
|                                                                                                                                                             | 30% | $\beta=0.59, p<0.001$                                             | $\beta=0.71, p<0.001$ | $\beta=0.76, p<0.001$ | $\beta=0.74, p<0.001$ |
|                                                                                                                                                             | 40% | $\beta=0.58, p<0.001$                                             | $\beta=0.70, p<0.001$ | $\beta=0.76, p<0.001$ | $\beta=0.73, p<0.001$ |
|                                                                                                                                                             | 50% | $\beta=0.58, p<0.001$                                             | $\beta=0.70, p<0.001$ | $\beta=0.76, p<0.001$ | $\beta=0.73, p<0.001$ |

*Supplementary table 2: Epicenter connectivity vs. tau positivity sequences including functional and structural connectivity*

| <i>Prediction of group-average tau positivity sequences by epicenter connectivity (as shown in Figures 2G&amp;H)</i> |                       |                       |
|----------------------------------------------------------------------------------------------------------------------|-----------------------|-----------------------|
| <i>Functional connectivity matrix restricted to ROI pairs with an underlying structural connection</i>               | <i>ADNI</i>           | <i>BioFINDER</i>      |
| <i>Strongest 10% structural connections</i>                                                                          | $\beta=0.53, p<0.001$ | $\beta=0.63, p<0.001$ |
| <i>Strongest 20% structural connections</i>                                                                          | $\beta=0.52, p<0.001$ | $\beta=0.62, p<0.001$ |
| <i>Strongest 30% structural connections</i>                                                                          | $\beta=0.64, p<0.001$ | $\beta=0.68, p<0.001$ |
| <i>Strongest 40% structural connections</i>                                                                          | $\beta=0.68, p<0.001$ | $\beta=0.69, p<0.001$ |
| <i>Strongest 50% structural connections</i>                                                                          | $\beta=0.69, p<0.001$ | $\beta=0.69, p<0.001$ |
| <i>Strongest 60% structural connections</i>                                                                          | $\beta=0.72, p<0.001$ | $\beta=0.70, p<0.001$ |
| <i>Strongest 70% structural connections</i>                                                                          | $\beta=0.74, p<0.001$ | $\beta=0.71, p<0.001$ |
| <i>Strongest 80% structural connections</i>                                                                          | $\beta=0.74, p<0.001$ | $\beta=0.71, p<0.001$ |
| <i>Strongest 90% structural connections</i>                                                                          | $\beta=0.73, p<0.001$ | $\beta=0.71, p<0.001$ |
